# Supplementary material for: Multiple Omics Integration Reveals Key Circular RNAs in Hepatocellular Carcinoma
Source: Front Oncol. 2021 May 18;11:621353. doi: 10.3389/fonc.2021.621353 (PMC8170000; doi:10.3389/fonc.2021.621353)
Supplement: Supplementary file 1 [file Table_1.xlsx]

## Sheet: A
Table A. The recurrence-free survival (RFS)-based survival analysis in Fudan-HCC cohort
Factors	log2 hazard ratio	hazard ratio	standard error	Z score	P-value
Cirrhosis (Y vs N)	0.702559	2.01891	0.422209	1.66401	0.0961111
TNM.staging (II vs I)	0.579107	1.78444	0.217674	2.66043	0.00780412
TNM.staging (III vs I)	0.285637	1.33061	0.35912	0.795381	0.426392
BCLC.staging (A vs 0)	0.744135	2.10462	0.425086	1.75055	0.0800233
BCLC.staging (B vs 0)	1.11761	3.05753	0.528342	2.11531	0.0344035
BCLC.staging (C vs 0)	1.82887	6.22688	0.555899	3.28994	0.00100209
AFP (low vs high)	0.0100332	1.01008	0.185493	0.0540896	0.956864
GOT2 (low vs high)	0.424512	1.52884	0.183677	2.31119	0.0104111

## Sheet: B
Table B. The overall survival (OS)-based survival analysis in Fudan-HCC cohort
Factors	log2 hazard ratio	hazard ratio	standard error	Z score	P-value
Cirrhosis (Y vs N)	1.50658	4.51126	0.723963	2.08101	0.0374326
TNM.staging (II vs I)	0.689037	1.9918	0.285959	2.40957	0.0159715
TNM.staging (III vs I)	0.819285	2.26888	0.425155	1.92703	0.0539761
BCLC.staging (A vs 0)	1.40033	4.05654	0.723037	1.93674	0.0527777
BCLC.staging (B vs 0)	1.57095	4.81119	0.805517	1.95023	0.0511485
BCLC.staging (C vs 0)	2.51532	12.3706	0.824489	3.05076	0.00228261
AFP (low vs high)	-0.203385	0.815964	0.224788	-0.904786	0.365579
GOT2 (low vs high)	0.628024	1.8739	0.224114	2.80225	0.00507472

## Sheet: C
Table C. The overall survival (OS)-based survival analysis in TCGA-HCC cohort
Factors	log2 hazard ratio	hazard ratio	standard error	Z score	P-value
Cirrhosis (Y vs N)	0.0154359	1.01556	0.305818	0.0504741	0.959745
TNM.staging (II vs I)	0.016238	1.01637	0.373742	0.043447	0.965345
TNM.staging (III vs I)	0.528009	1.69555	0.332169	1.58958	0.111929
TNM.staging (IV vs I)	2.24385	9.42953	0.677759	3.31069	0.00093067
AFP (low vs high)	0.186732	1.2053	0.325462	0.573743	0.566142
GOT2 (low vs high)	0.78979	2.20293	0.295537	2.67239	0.00753135
