# Supplementary material for: Multiple Omics Integration Reveals Key Circular RNAs in Hepatocellular Carcinoma
Source: Front Oncol. 2021 May 18;11:621353. doi: 10.3389/fonc.2021.621353 (PMC8170000; doi:10.3389/fonc.2021.621353)
Supplement: Supplementary file 2 [file Table_2.xlsx]

## Sheet: hsa_circ_0002130 expression
group	hsa_circ_0002130	Cell
OE	2.042	MHCC97H
OE	1.929	MHCC97H
OE	2.248	MHCC97H
Control	0.715	MHCC97H
Control	0.696	MHCC97H
Control	0.742	MHCC97H
OE	3.148	Hep3B
OE	2.521	Hep3B
OE	2.978	Hep3B
Control	1.215	Hep3B
Control	0.896	Hep3B
Control	1.042	Hep3B

## Sheet: CCK8 data
Group	Time	R1	R2	R3
Hep3B-OE	0	0.246	0.197	0.184
Hep3B-OE	24	0.272	0.309	0.231
Hep3B-OE	48	0.385	0.406	0.331
Hep3B-OE	72	0.638	0.744	0.649
Hep3B-OE	96	1.286	1.301	1.157
Hep3B-vector	0	0.205	0.17	0.244
Hep3B-vector	24	0.299	0.226	0.315
Hep3B-vector	48	0.556	0.483	0.535
Hep3B-vector	72	0.941	0.86	0.842
Hep3B-vector	96	1.698	1.583	1.545
MHCC97H-vector	0	0.184	0.24	0.198
MHCC97H-vector	24	0.258	0.309	0.275
MHCC97H-vector	48	0.565	0.586	0.487
MHCC97H-vector	72	0.928	0.991	0.879
MHCC97H-vector	96	1.878	1.688	1.827
MHCC97H-OE	0	0.211	0.162	0.187
MHCC97H-OE	24	0.319	0.288	0.26
MHCC97H-OE	48	0.478	0.42	0.401
MHCC97H-OE	72	0.84	0.813	0.76
MHCC97H-OE	96	1.489	1.578	1.458

## Sheet: GOT2 expression
GOT2.expr	group	Cell
0.514	Control	MHCC97H
1.263	Control	MHCC97H
0.564	Control	MHCC97H
2.316	OE	MHCC97H
2.311	OE	MHCC97H
1.528	OE	MHCC97H
1.117	Control	Hep3B
0.827	Control	Hep3B
1.07	Control	Hep3B
2.729	OE	Hep3B
2.189	OE	Hep3B
2.821	OE	Hep3B
